# Supplementary material
Source: Springer Nature journal article supplement (https://www.springermedizin.de/resource/supplementary/12943_2014_1418_MOESM8_ESM.pdf/9552930)

**A**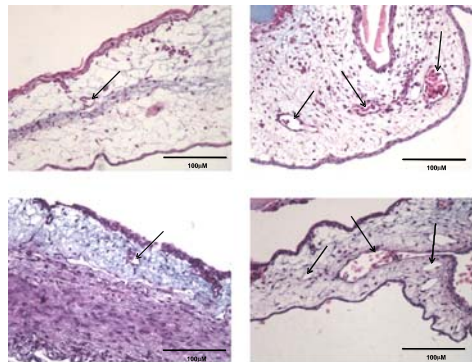**B**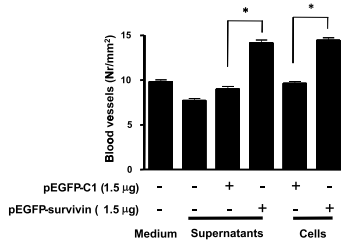**C**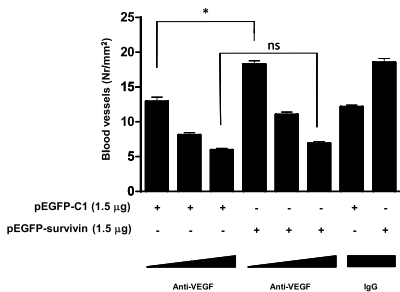**D**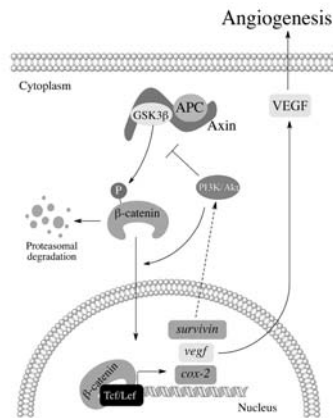

Supplement: MOESM8 [file 9552930]
